# Supplementary material for: PAS Domain Protein Pas3 Interacts with the Chromatin Modifier Bre1 in Regulating Cryptococcal Morphogenesis
Source: PubMed Central journal article supplement (PMC6234864; doi:10.1128/mbio.02135-18), 2018-11-13

**A** H99  $\alpha$  x KN99 a *pas3* $\Delta$   $\alpha$  x KN99 a KN99 a x *pas3* $\Delta$

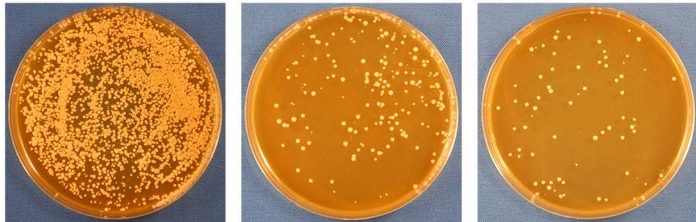

**B**

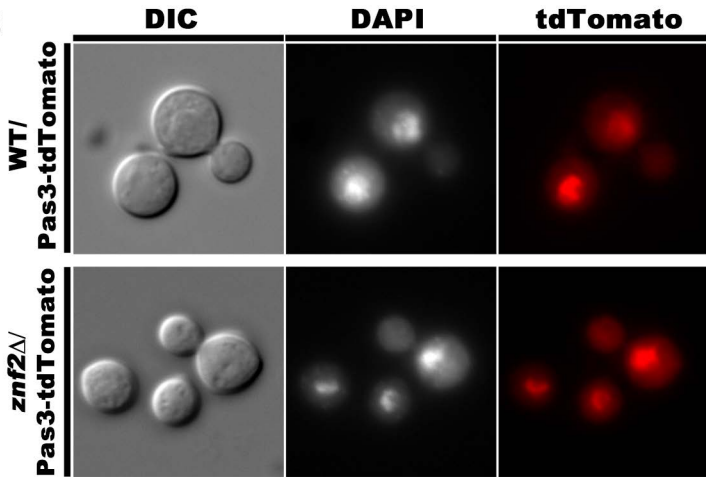

Supplement: mbo005184156sf2.pdf [file mbo005184156sf2.pdf]
