# Supplementary material for: PAS Domain Protein Pas3 Interacts with the Chromatin Modifier Bre1 in Regulating Cryptococcal Morphogenesis
Source: PubMed Central journal article supplement (PMC6234864; doi:10.1128/mbio.02135-18), 2018-11-13
Supplement: mbo005184156sf4.pdf [file mbo005184156sf4.pdf]

**BD Bwc1**  
**AD Bwc2**

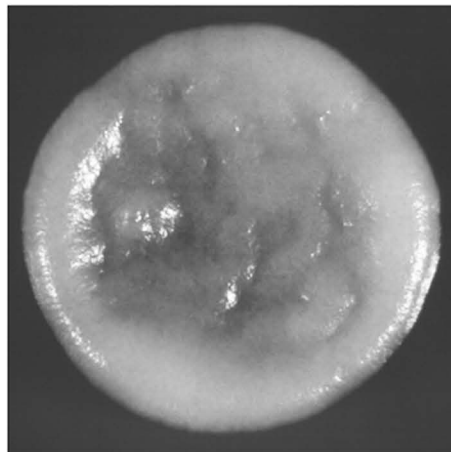

**BD Bwc2**  
**AD Bwc1**

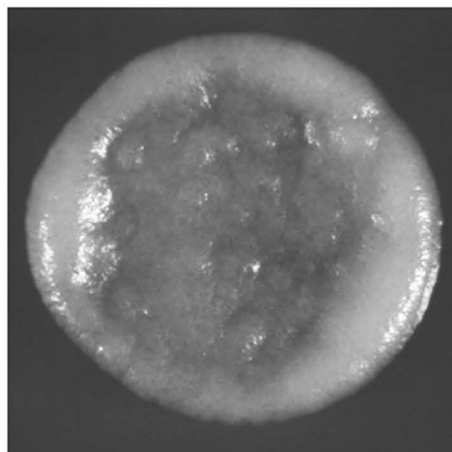

**BD Pas3**  
**AD Pas1**

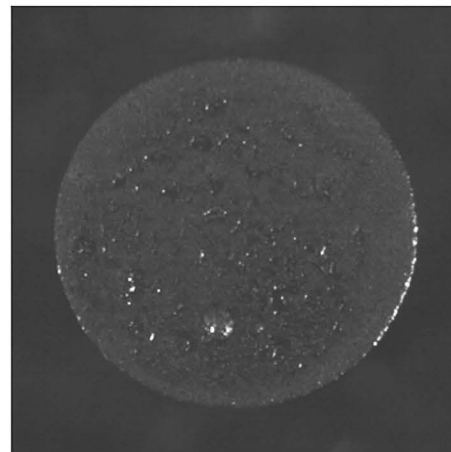

**BD Pas3**  
**AD Pas2**

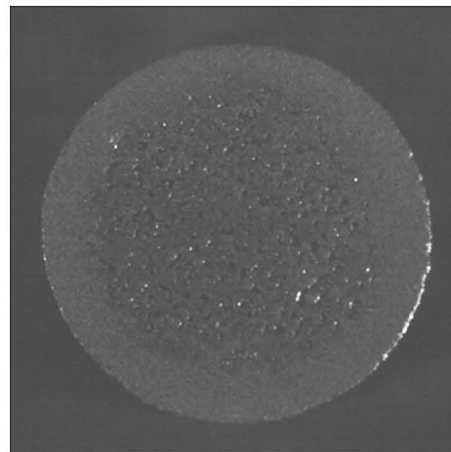

**BD Pas3**  
**AD Bwc2**

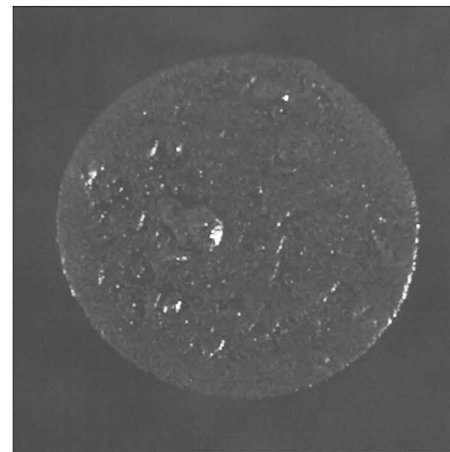

**-his**  
**-ade**
